# Supplementary material for: CD99 polymorphisms significantly influence the probability to develop Ewing sarcoma in earlier age and patient disease progression
Source: PubMed Central journal article supplement (PMC5363635; doi:10.18632/oncotarget.12862), 2016-10-25
Supplement: oncotarget-07-77958-s001.pdf [file oncotarget-07-77958-s001.pdf]

## CD99 polymorphisms significantly influence the probability to develop Ewing sarcoma in earlier age and patient disease progression

### SUPPLEMENTARY TABLES AND FIGURE

Supplementary Table S1: Association analysis between CD99 polymorphisms and EWS

| SNP information |          | Genotype count case |    |    | Genotype count control |    |    | MAF  |         | AA      | Odds Ratio (95% CI) |                   |
|-----------------|----------|---------------------|----|----|------------------------|----|----|------|---------|---------|---------------------|-------------------|
| SNP ID          | Alleles* | 11                  | 12 | 22 | 11                     | 12 | 22 | case | control | P value | OR <sub>het</sub>   | OR <sub>hom</sub> |
| rs2109560       | C/T      | 46                  | 41 | 8  | 62                     | 70 | 12 | 0.30 | 0.33    | 0.54    | 0.79 (0.46-1.36)    | 0.90 (0.34-2.38)  |
| rs167453        | G/T      | 37                  | 53 | 10 | 64                     | 63 | 20 | 0.36 | 0.35    | 0.74    | 1.46 (0.84-2.51)    | 0.87 (0.37-2.04)  |
| rs5982572       | A/G      | 26                  | 55 | 18 | 49                     | 67 | 30 | 0.46 | 0.43    | 0.59    | 1.55 (0.85-2.80)    | 1.13 (0.53-2.40)  |
| rs311057        | A/G      | 56                  | 35 | 1  | 95                     | 33 | 9  | 0.20 | 0.19    | 0.69    | 1.80 (1.01-3.21)    | 0.19 (0.02-1.53)  |
| rs311059        | C/T      | 47                  | 44 | 9  | 81                     | 49 | 17 | 0.31 | 0.28    | 0.51    | 1.55 (0.90-2.66)    | 0.91 (0.38-2.21)  |
| rs7051896       | A/T      | 38                  | 43 | 14 | 52                     | 67 | 24 | 0.37 | 0.40    | 0.53    | 0.88 (0.50-1.55)    | 0.80 (0.37-1.74)  |
| rs311077        | C/G      | 55                  | 35 | 10 | 78                     | 57 | 12 | 0.28 | 0.28    | 0.99    | 0.87 (0.51-1.51)    | 1.18 (0.48-2.93)  |
| rs5939307       | C/T      | 58                  | 30 | 12 | 84                     | 45 | 17 | 0.27 | 0.27    | 0.99    | 0.97 (0.55-1.71)    | 1.02 (0.45-2.30)  |
| rs5939113       | A/G      | 71                  | 17 | 5  | 98                     | 23 | 8  | 0.15 | 0.15    | 0.86    | 1.02 (0.51-2.05)    | 0.86 (0.27-2.75)  |
| rs311083        | C/G      | 34                  | 56 | 10 | 63                     | 63 | 21 | 0.38 | 0.36    | 0.60    | 1.65 (0.95-2.86)    | 0.88 (0.37-2.09)  |
| rs178127        | G/T      | 47                  | 39 | 10 | 63                     | 58 | 17 | 0.31 | 0.33    | 0.55    | 0.90 (0.52-1.57)    | 0.79 (0.33-1.88)  |
| rs312258        | A/C      | 63                  | 33 | 4  | 79                     | 55 | 13 | 0.21 | 0.28    | 0.07    | 0.75 (0.44-1.30)    | 0.39 (0.12-1.24)  |
| rs312257        | C/T      | 73                  | 27 | 0  | 112                    | 31 | 4  | 0.14 | 0.13    | 0.94    | 1.34 (0.74-2.42)    | 0.17 (0.01-3.21)  |
| rs311097        | C/G      | 43                  | 47 | 10 | 55                     | 68 | 20 | 0.34 | 0.38    | 0.33    | 0.88 (0.51-1.53)    | 0.64 (0.27-1.51)  |
| rs311100        | A/G      | 54                  | 39 | 7  | 79                     | 54 | 13 | 0.27 | 0.27    | 0.83    | 1.06 (0.62-1.81)    | 0.79 (0.30-2.10)  |
| rs5939312       | A/G      | 74                  | 25 | 1  | 111                    | 35 | 1  | 0.14 | 0.13    | 0.77    | 1.07 (0.59-1.94)    | 1.50 (0.09-24.36) |

Abbreviations: SNP, single nucleotide polymorphism; MAF, minor allele frequency; AA, allelic association; OR<sub>het</sub>, odds ratio for heterozygote; OR<sub>hom</sub>, odds ratio for homozygote.

\*Major allele is provided first.

Supplementary Table S2: Clinicopathological features of 121 patients with primary osteosarcoma

| Characteristics              | N.  | %  |
|------------------------------|-----|----|
| <b>Gender</b>                |     |    |
| Female                       | 44  | 36 |
| Male                         | 77  | 64 |
| <b>Age</b>                   |     |    |
| ≤ 14 years                   | 28  | 23 |
| > 14 years                   | 93  | 77 |
| <b>Location</b>              |     |    |
| Extremity                    | 111 | 92 |
| Other                        | 10  | 8  |
| <b>Histological subtypes</b> |     |    |
| Osteoblastic                 | 88  | 73 |
| Fibroblastic                 | 14  | 11 |
| Others                       | 19  | 16 |
| <b>Surgery</b>               |     |    |
| Resection                    | 103 | 85 |
| Amputation                   | 11  | 9  |
| Not done                     | 7   | 6  |
